# Supplementary material for: Predict Score: A New Biological and Clinical Tool to Help Predict Risk of Intensive Care Transfer for COVID-19 Patients
Source: MDPI journal article supplement (doi:10.3390/biomedicines9050566), 2021-05-18
Supplement: s1 [file s1]

**Supplementary Table 1. NEWS (National Early Warning Score) 2 scoring system calculation and interpretation**

| Physiological parameter        | Score                                                                                                                                                                                 |        |           |                     |                    |                    |                                                   |
|--------------------------------|---------------------------------------------------------------------------------------------------------------------------------------------------------------------------------------|--------|-----------|---------------------|--------------------|--------------------|---------------------------------------------------|
|                                | +3                                                                                                                                                                                    | +2     | +1        | 0                   | +1                 | +2                 | +3                                                |
| Respiration rate (per minute)  | ≤ 8                                                                                                                                                                                   |        | 9-11      | 12-20               |                    | 21-24              | ≥ 25                                              |
| SpO <sub>2</sub> scale 1 (%)*  | ≤ 91                                                                                                                                                                                  | 92-93  | 94-95     | ≥96                 |                    |                    |                                                   |
| SpO <sub>2</sub> scale 2 (%)*  | ≤ 83                                                                                                                                                                                  | 84-85  | 86-87     | 88-92<br>≥93 on air | 93-94<br>on oxygen | 95-96<br>on oxygen | ≥ 97<br>on oxygen                                 |
| Air or oxygen ?                |                                                                                                                                                                                       | Oxygen |           | Air                 |                    |                    |                                                   |
| Systolic blood pressure (mmHg) | ≤ 90                                                                                                                                                                                  | 91-100 | 101-110   | 111-219             |                    |                    | ≥ 220                                             |
| Heart rate (per minute)        | ≤ 40                                                                                                                                                                                  |        | 41-50     | 51-90               | 91-110             | 111-130            | ≥ 131                                             |
| Consciousness                  |                                                                                                                                                                                       |        |           | Alert               |                    |                    | New-onset confusion (or disorientation/agitation) |
| Temperature (°C)               | ≤ 35.0                                                                                                                                                                                |        | 35.1-36.0 | 36.1-38.0           | 38.1-39.0          | ≥ 39.1             |                                                   |
| NEWS2 interpretation           | Aggregate score = <b>0-4:</b> <b>Low</b> clinical risk<br>Aggregate score = <b>5-6:</b> <b>Medium</b> clinical risk<br>Aggregate score = <b>7 or above:</b> <b>High</b> clinical risk |        |           |                     |                    |                    |                                                   |

\* SpO<sub>2</sub> Scale 1: SpO<sub>2</sub> on room air or supplemental O<sub>2</sub> if patient has no hypercapnic respiratory failure.  
 SpO<sub>2</sub> Scale 2: If patient has hypercapnic respiratory failure
